# Supplementary material for: Differential Relevance of NF-κB and JNK in the Pathophysiology of Hemorrhage/Resususcitation-Induced Liver Injury after Chronic Ethanol Feeding
Source: PLoS One. 2015 Sep 14;10(9):e0137875. doi: 10.1371/journal.pone.0137875 (PMC4569329; doi:10.1371/journal.pone.0137875)
Supplement: S1 Data — (XLSX) [file pone.0137875.s001.xlsx]

## Sheet: Blatt1
1		1		1		1		2		2		2		4		4		5		5		6		6
4.518	0.138	1.923	0.1704	0.7396	0.03528	69.15	2.046	162.5	15.18	50	11.24	1095	113.1	50	12.07	5.974	2.441	506	117.3	238.4	52.37	22.67	1.647	14.17	3.478
5.212	0.1583	2.666	0.2842	0.7786	0.05654	71.27	3.481	210	35.55	96.67	11.22	2056	528.4	87.71	4.577	8.755	0.8202	251.3	102.6	105.4	65.98	20.83	1.701	15.83	2.535
				0.725	0.0441	74.42	2.682	212.2	23.96	111.7	25.67	1052	127	103.3	26.81	5.282	2.092	56.62	12.68	242.5	61.44	21.83	1.682	49.67	6.97
				0.6992	0.02891	75.16	1.264	255.5	17.39	116.3	20.85	1932	524.1	104.8	9.479	3.585	1.795	142.2	74.91	71.2	35.55	23.83	1.851	40.67	5.031
						66.28	2.426	1162	298.2	781.9	228.5	8529	1968	182	31.35	13.43	3.248					88.5	7.07	46.17	7.596
						69.86	3.398	694.3	147.9	332.2	189.8	4776	1115	127.8	11.27	9.373	2.058					30.17	6.838	24.33	2.871
						73.72	2.533	2577	699.9	1614	483.9	24605	7161	337.7	73.63	11.09	2.735					96	3.209	98.67	6.702
						74.88	1.91	2893	577.4	1607	663.2	20092	5783	468.6	106.3	16.24	3.066					101	4.336	78.83	12.9
						30.43	0.3647
						29.93	0.2632
						29.86	0.3792
						29.87	0.383
						30.52	0.256
						30.49	0.6584
						29.68	0.2793
						30.2	0.3706
						30.85	0.3106
						30.86	1.158
						29.69	0.3674
						30.64	0.5393
						73.98	3.661
						74.13	4.026
						69.52	5.539
						68.62	6.093
						74.46	2.468
						75	4.336
						70.08	5.461
						70.09	5.727
